# Supplementary material for: Association of urine mitochondrial DNA with clinical measures of COPD in the SPIROMICS cohort
Source: JCI journal article supplement (doi:10.1172/jci.insight.133984), 2020-01-02
Supplement: sd1 [file 1]

## **SUPPLEMENTARY FIGURE LEGENDS**

**Supplementary Figure 1. UACR is not strongly associated with 6MWD, SGRQ, or radiographic measures of COPD. (A-E)** UACR (log<sub>2</sub> mg/g) and association with 6MWD **(A)**, SGRQ **(B)**, %LAA < -950 HU **(C)**, PRM<sup>EMPH</sup> **(D)**, and PRM<sup>FSAD</sup> **(E)**, tested with unadjusted linear regression models (never smokers n=56-63, smokers without airflow obstruction n=94-107, mild/moderate COPD n=123-135, severe COPD n=148-165). Linear associations **(A-E)** were implemented with unadjusted linear regression models.

**Supplementary Figure 2. U-mtDNA levels do not associate with FEV<sub>1</sub> % predicted in the SPIROMICS cohort.** U-mtDNA (log<sub>2</sub> copies mtDNA/g creatinine) and association with post-bronchodilator FEV<sub>1</sub> % predicted in each subgroup: never smokers (n=62; red), smokers without airflow obstruction (“smokers”, n=107; green), participants with mild/moderate COPD (n=139; blue), and severe COPD (n=166; purple). Linear associations were implemented with unadjusted linear regression models.

**Supplementary Figure 3. U-mtDNA levels are associated with UACR.** U-mtDNA (log<sub>2</sub> copies mtDNA/g creatinine) and association with UACR (log<sub>2</sub> mg/g), tested with unadjusted linear regression models (never smokers n=63, smokers without airflow obstruction n=107, mild/moderate COPD n=136, severe COPD n=166). Linear association was implemented with unadjusted linear regression models.

**Supplementary Figure 4. Unadjusted u-mtDNA is not associated with radiographic measures of emphysema. (A-C)** U-mtDNA (log 2 copies mtDNA/g creatinine) and association with %LAA < -950 HU **(A)**, PRM<sup>EMPH</sup> **(B)**, and PRM<sup>FSAD</sup> **(C)**, tested with unadjusted linear regression models (never-smokers n=56-63, smokers without airflow obstruction n=94-107, mild/moderate COPD n=126-138, severe COPD n=148-165).

**Supplementary Figure 5. UACR does not differ between males and females.** UACR (log 2 mg/g) levels in males (n=252) compared to females (n=220) in all participants. Data is presented as median with box indicating upper and lower quartiles, whiskers indicating extrema, and with p-values calculated by non-parametric Kruskal-Wallis test.

**Supplementary Table 1. Baseline characteristics of the urine mtDNA study compared to the overall SPIROMICS cohort**

| Parameter                                                                                                                                          | Urine mtDNA Study<br>(n=475) | SPIROMICS Cohort<br>(n=2491) | <i>P-value</i> * |
|----------------------------------------------------------------------------------------------------------------------------------------------------|------------------------------|------------------------------|------------------|
| Age, median [IQR]                                                                                                                                  | 65.0 [55.0-70.0]             | 64.0 [57.0-70.0]             | 0.656            |
| Male N (%)                                                                                                                                         | 253 (53.3)                   | 1319 (53.0)                  | 0.940            |
| Body Mass Index, median [IQR]                                                                                                                      | 27.7 [24.5-32.0]             | 27.5 [24.1-31.5]             | 0.319            |
| Current Non-Smoker N (%)                                                                                                                           | 332 (71.7)                   | 1502 (61.0)                  | <0.001           |
| Subgroup N (%)                                                                                                                                     |                              |                              |                  |
| Non-Smokers                                                                                                                                        | 63 (13.3)                    | 138 (5.5)                    | <0.001           |
| Smoker without COPD                                                                                                                                | 107 (22.5)                   | 832 (33.4)                   |                  |
| Mild/Moderate COPD                                                                                                                                 | 139 (29.3)                   | 1065 (42.8)                  |                  |
| Severe COPD                                                                                                                                        | 166 (34.9)                   | 456 (18.3)                   |                  |
| Genitourinary Condition N (%)                                                                                                                      | 163 (35.2)                   | 886 (36.6)                   | 0.605            |
| *Kruskal-Wallis or Chi-square test comparing participants in this study with the entire SPIROMICS cohort<br>Abbreviations: IQR=interquartile range |                              |                              |                  |

**Supplementary Table 2. Urine albumin/creatinine ratio and clinical characteristics**

|                              | Unadjusted              |                  | Adjusted for Age, Sex, BMI, & Smoking Status |                  |
|------------------------------|-------------------------|------------------|----------------------------------------------|------------------|
|                              | $\hat{\beta}$ (CI)      | <i>P</i> -value* | $\hat{\beta}$ (CI)                           | <i>P</i> -value* |
| FEV <sub>1</sub> % Predicted | -0.11<br>(-0.20,-0.03)  | 0.011            | -0.08<br>(-0.17,0.01)                        | 0.086            |
| 6MWD (meters)                | -0.01<br>(-0.02,0.001)  | 0.081            | -0.01<br>(-0.02,0.004)                       | 0.250            |
| SGRQ                         | 0.005<br>(-0.001,0.01)  | 0.120            | 0.004<br>(-0.003,0.01)                       | 0.264            |
| CAT (≥10)                    | 0.38<br>(0.10,0.66)     | 0.009            | 0.31<br>(0.02,0.59)                          | 0.034            |
| Emphysema % (<950 HU)        | 0.001<br>(-0.01,0.01)   | 0.826            | -0.004<br>(-0.02,0.01)                       | 0.550            |
| PRM <sup>EMPH</sup>          | -0.0001<br>(-0.01,0.01) | 0.992            | -0.005<br>(-0.02,0.01)                       | 0.433            |
| PRM <sup>FSAD</sup>          | 0.01<br>(0.0005,0.02)   | 0.039            | 0.002<br>(-0.01,0.01)                        | 0.719            |

\*Univariable or multivariable linear regression  
Abbreviations: BMI=body mass index,  $\beta$ =beta, CI=confidence interval, FEV<sub>1</sub>=forced expiratory volume in 1 second, 6MWD=six-minute walk distance, SGRQ=St. George's Respiratory Questionnaire, CAT=COPD Assessment Test, HU=Hounsfield units, PRM<sup>EMPH</sup>=emphysema by parametric response mapping, PRM<sup>FSAD</sup>=functional small airway disease by parametric response mapping

**Supplementary Table 3. Urine mtDNA and imaging parameters**

|                       | Unadjusted              |                  | Adjusted for Age, Sex, BMI, & Smoking Status |                  |
|-----------------------|-------------------------|------------------|----------------------------------------------|------------------|
|                       | $\hat{\beta}$ (CI)      | <i>P</i> -value* | $\hat{\beta}$ (CI)                           | <i>P</i> -value* |
| Emphysema % (<950 HU) | 0.002<br>(-0.01,0.01)   | 0.693            | 0.01<br>(0.0002,0.02)                        | 0.048            |
| PRM <sup>EMPH</sup>   | 0.004<br>(-0.01,0.01)   | 0.472            | 0.01<br>(0.0000,0.02)                        | 0.050            |
| PRM <sup>FSAD</sup>   | -0.0004<br>(-0.01,0.01) | 0.925            | 0.01<br>(-0.01,0.02)                         | 0.228            |

\*Univariable or multivariable linear regression  
Abbreviations: BMI=body mass index,  $\beta$ =beta, CI=confidence interval,  
HU=Hounsfield units, PRM<sup>EMPH</sup>=emphysema by parametric response mapping,  
PRM<sup>FSAD</sup>=functional small airway disease by parametric response mapping

**Supplementary Table 4. Urine albumin/creatinine ratio in females compared to males**

| Unadjusted            |                  | Adjusted for Age, BMI, & Smoking Status |                  |
|-----------------------|------------------|-----------------------------------------|------------------|
| $\hat{\beta}$ (CI)    | <i>P-value</i> * | $\hat{\beta}$ (CI)                      | <i>P-value</i> * |
| -0.02<br>(-0.28,0.24) | 0.894            | 0.09<br>(-0.17,0.36)                    | 0.486            |

\*Univariable or multivariable linear regression  
Abbreviations: BMI=body mass index,  $\beta$ =beta, CI=confidence interval

**Supplementary Table 5. Urine albumin/creatinine ratio and clinical characteristics within males and females**

|                                    | Unadjusted              |                  | Adjusted for Age, BMI, & Smoking Status |                  |
|------------------------------------|-------------------------|------------------|-----------------------------------------|------------------|
|                                    | $\hat{\beta}$ (CI)      | <i>P</i> -value* | $\hat{\beta}$ (CI)                      | <i>P</i> -value* |
| <b>FEV<sub>1</sub> % Predicted</b> |                         |                  |                                         |                  |
| Males                              | -0.11<br>(-0.24,0.01)   | 0.082            | -0.08<br>(-0.21,0.05)                   | 0.237            |
| Females                            | -0.12<br>(-0.24,-0.004) | 0.059            | -0.08<br>(-0.20,0.04)                   | 0.198            |
| <b>6MWD (meters)</b>               |                         |                  |                                         |                  |
| Males                              | -0.01<br>(-0.02,0.006)  | 0.229            | -0.004<br>(-0.02,0.01)                  | 0.567            |
| Females                            | -0.01<br>(-0.03,0.005)  | 0.185            | -0.01<br>(-0.03,0.06)                   | 0.223            |
| <b>SGRQ</b>                        |                         |                  |                                         |                  |
| Males                              | 0.01<br>(-0.004,0.01)   | 0.250            | 0.004<br>(-0.005,0.01)                  | 0.353            |
| Females                            | 0.004<br>(-0.004,0.01)  | 0.295            | 0.004<br>(-0.005,0.01)                  | 0.378            |
| <b>CAT (≥10)</b>                   |                         |                  |                                         |                  |
| Males                              | 0.47<br>(0.06,0.88)     | 0.027            | 0.40<br>(-0.005,0.81)                   | 0.054            |
| Females                            | 0.28<br>(-0.10,0.66)    | 0.155            | 0.22<br>(0.16,0.61)                     | 0.261            |
| <b>Emphysema % (&lt;950 HU)</b>    |                         |                  |                                         |                  |
| Males                              | -0.01<br>(-0.02,0.006)  | 0.214            | -0.01<br>(-0.03,0.006)                  | 0.196            |
| Females                            | 0.01<br>(0.0000,0.03)   | 0.052            | 0.01<br>(-0.01,0.02)                    | 0.370            |
| <b>PRM<sup>EMPH</sup></b>          |                         |                  |                                         |                  |
| Males                              | -0.01<br>(-0.02,0.01)   | 0.243            | -0.01<br>(-0.03,0.01)                   | 0.266            |
| Females                            | 0.01<br>(-0.003,0.03)   | 0.118            | 0.01<br>(-0.01,0.02)                    | 0.539            |
| <b>PRM<sup>FSAD</sup></b>          |                         |                  |                                         |                  |
| Males                              | 0.01<br>(-0.004,0.02)   | 0.203            | 0.003<br>(-0.01,0.02)                   | 0.654            |
| Females                            | 0.01<br>(-0.002,0.02)   | 0.118            | 0.001<br>(-0.01,0.01)                   | 0.857            |

\*Univariable or multivariable linear regression  
Abbreviations: BMI=body mass index,  $\beta$ =beta, CI=confidence interval, FEV<sub>1</sub>=forced expiratory volume in 1 second, 6MWD=six-minute walk distance, SGRQ=St. George's Respiratory Questionnaire, CAT=COPD Assessment Test, HU=Hounsfield units, PRM<sup>EMPH</sup>=emphysema by parametric response mapping, PRM<sup>FSAD</sup>=functional small airway disease by parametric response mapping

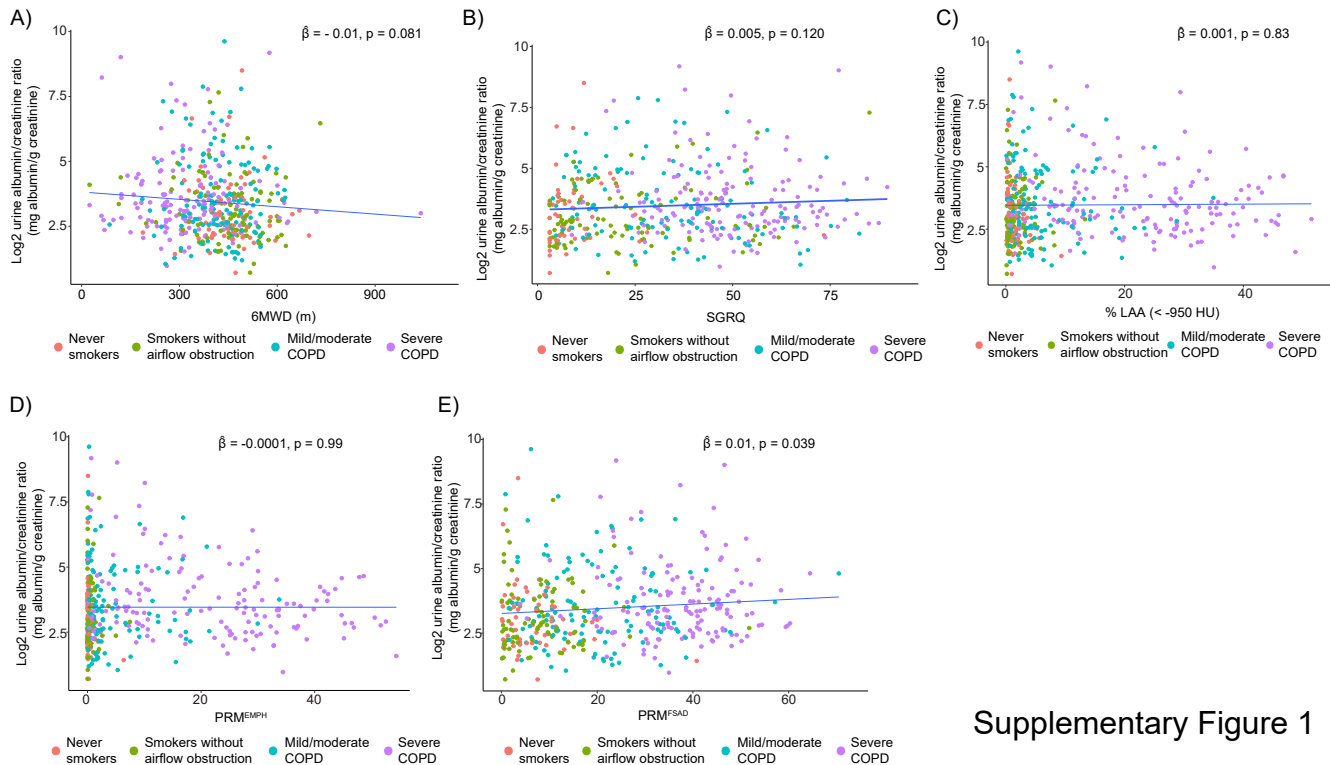

Supplementary Figure 1



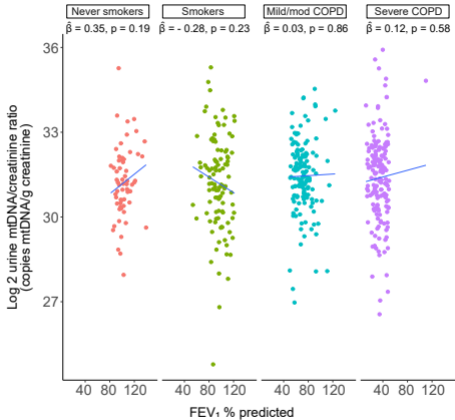

Supplementary Figure 2

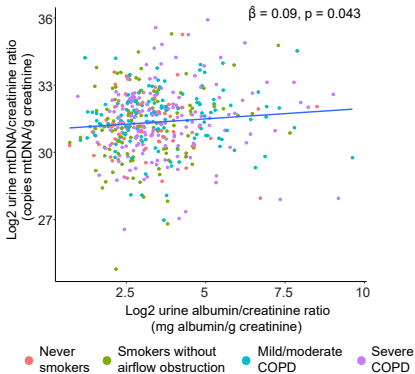

Supplementary Figure 3

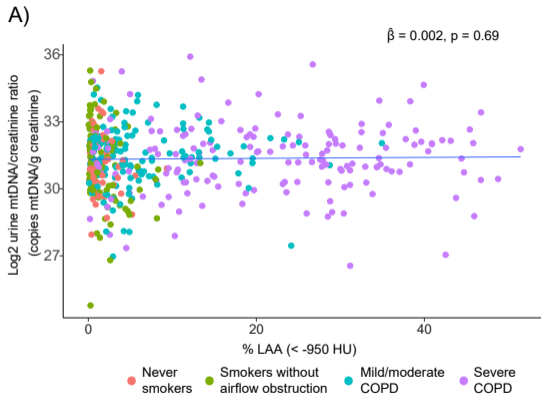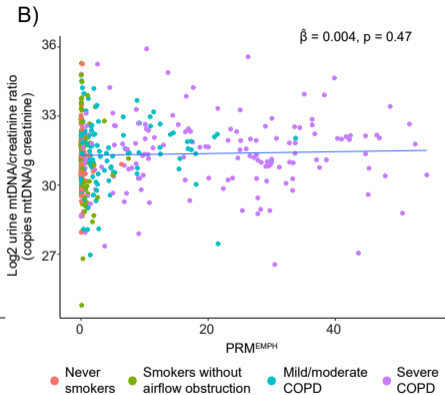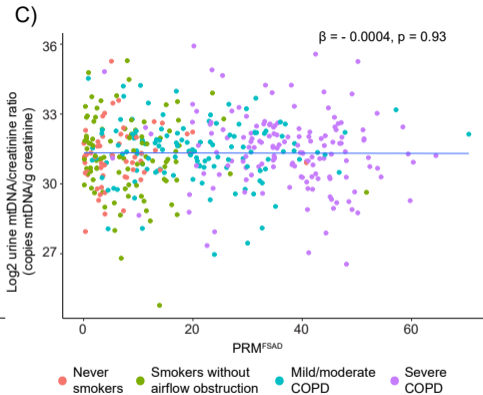

Supplementary Figure 4

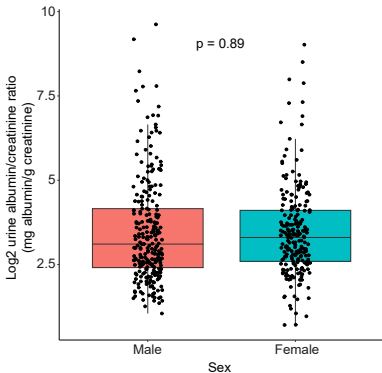

Supplementary Figure 5
