# Supplementary material for: Association of urine mitochondrial DNA with clinical measures of COPD in the SPIROMICS cohort
Source: JCI journal article supplement (doi:10.1172/jci.insight.133984), 2020-01-02
Supplement: sd1 [file 1]

## **SUPPLEMENTARY FIGURE LEGENDS**

**Supplementary Figure 1. UACR is not strongly associated with 6MWD, SGRQ, or radiographic measures of COPD.** (A-E) UACR (log<sub>2</sub> mg/g) and association with 6MWD (A), SGRQ (B), %LAA < -950 HU (C), PRM<sup>EMPH</sup> (D), and PRM<sup>FSAD</sup> (E), tested with unadjusted linear regression models (never smokers n=56-64, smokers without airflow obstruction n=96-109, mild/moderate COPD n=124-135, severe COPD n=149-162). Linear associations (A-E) were implemented with unadjusted linear regression models.

**Supplementary Figure 2. U-mtDNA levels do not associate with FEV<sub>1</sub> % predicted in the SPIROMICS cohort.** U-mtDNA (log<sub>2</sub> copies mtDNA/g creatinine) and association with post-bronchodilator FEV<sub>1</sub> % predicted in each subgroup: never smokers (n=63; red), smokers without airflow obstruction ("smokers", n=109; green), participants with mild/moderate COPD (n=142; blue), and severe COPD (n=168; purple). Linear associations were implemented with unadjusted linear regression models.

**Supplementary Figure 3. U-mtDNA levels are associated with UACR.** U-mtDNA (log<sub>2</sub> copies mtDNA/g creatinine) and association with UACR (log<sub>2</sub> mg/g), tested with unadjusted linear regression models (never smokers n=64, smokers without airflow obstruction n=109, mild/moderate COPD n=139, severe COPD n=168). Linear association was implemented with unadjusted linear regression models.

**Supplementary Figure 4. Unadjusted u-mtDNA is not associated with radiographic measures of emphysema. (A-C)** U-mtDNA (log 2 copies mtDNA/g creatinine) and association with %LAA < -950 HU **(A)**, PRM<sup>EMPH</sup> **(B)**, and PRM<sup>FSAD</sup> **(C)**, tested with unadjusted linear regression models (never-smokers n=56-64, smokers without airflow obstruction n=96-101, mild/moderate COPD n=127-129, severe COPD n=150-155).

**Supplementary Figure 5. UACR does not differ between males and females.** UACR (log 2 mg/g) levels in males (n=257) compared to females (n=223) in all participants. Data is presented as median with box indicating upper and lower quartiles, whiskers indicating extrema, and with p-values calculated by non-parametric Kruskal-Wallis test.

**Supplementary Table 1. Baseline characteristics of the urine mtDNA study compared to the overall SPIROMICS cohort**

| Parameter                                                                                                                                                                   | Urine mtDNA study<br>(n=483) | SPIROMICS cohort<br>(n=2974) | <i>P-value*</i> |
|-----------------------------------------------------------------------------------------------------------------------------------------------------------------------------|------------------------------|------------------------------|-----------------|
| Age, median [IQR]                                                                                                                                                           | 65.0 [55.0-70.0]             | 64.0 [56.0-70.0]             | 0.601           |
| Male N (%)                                                                                                                                                                  | 258 (53.4)                   | 1577 (53.0)                  | 0.912           |
| Body mass index, median [IQR]                                                                                                                                               | 27.7 [24.6-32.0]             | 27.5 [24.2-31.6]             | 0.378           |
| Current non-smoker N (%)                                                                                                                                                    | 337 (71.5)                   | 1839 (62.7)                  | <0.001          |
| Subgroup N (%)                                                                                                                                                              |                              |                              |                 |
| Never smokers                                                                                                                                                               | 64 (13.3)                    | 202 (6.8)                    | <0.001          |
| Smoker without airflow obstruction                                                                                                                                          | 109 (22.6)                   | 941 (31.6)                   |                 |
| Mild/moderate COPD                                                                                                                                                          | 142 (29.4)                   | 1207 (40.6)                  |                 |
| Severe COPD                                                                                                                                                                 | 168 (34.8)                   | 624 (21.0)                   |                 |
| Genitourinary condition N (%)                                                                                                                                               | 167 (35.5)                   | 1053 (36.4)                  | 0.728           |
| *Kruskal-Wallis or Chi-square test comparing participants in this study with the entire SPIROMICS cohort<br>Abbreviations: IQR=interquartile range; 25% and 75% percentiles |                              |                              |                 |

**Supplementary Table 2. Urine albumin/creatinine ratio and clinical characteristics**

|                                                                                                                                                                                                                                                                                                                                                                                                                                                                                                                                                                                                       | Unadjusted             |                  | Adjusted for age, sex, BMI, & smoking status |                  |
|-------------------------------------------------------------------------------------------------------------------------------------------------------------------------------------------------------------------------------------------------------------------------------------------------------------------------------------------------------------------------------------------------------------------------------------------------------------------------------------------------------------------------------------------------------------------------------------------------------|------------------------|------------------|----------------------------------------------|------------------|
|                                                                                                                                                                                                                                                                                                                                                                                                                                                                                                                                                                                                       | $\hat{\beta}$ (CI)     | <i>P</i> -value* | $\hat{\beta}$ (CI)                           | <i>P</i> -value* |
| FEV <sub>1</sub> % predicted                                                                                                                                                                                                                                                                                                                                                                                                                                                                                                                                                                          | -0.12<br>(-0.20,-0.03) | 0.009            | -0.08<br>(-0.17,0.01)                        | 0.069            |
| 6MWD (meters)                                                                                                                                                                                                                                                                                                                                                                                                                                                                                                                                                                                         | -0.01<br>(-0.02,0.002) | 0.055            | -0.01<br>(-0.02,0.003)                       | 0.179            |
| SGRQ                                                                                                                                                                                                                                                                                                                                                                                                                                                                                                                                                                                                  | 0.005<br>(-0.001,0.01) | 0.114            | 0.004<br>(-0.002,0.01)                       | 0.221            |
| CAT (≥10)                                                                                                                                                                                                                                                                                                                                                                                                                                                                                                                                                                                             | 0.37<br>(0.09,0.65)    | 0.009            | 0.31<br>(0.03,0.59)                          | 0.033            |
| %LAA (<-950 HU)                                                                                                                                                                                                                                                                                                                                                                                                                                                                                                                                                                                       | 0.002<br>(-0.01,0.01)  | 0.720            | -0.002<br>(-0.01,0.01)                       | 0.689            |
| PRM <sup>EMPH</sup>                                                                                                                                                                                                                                                                                                                                                                                                                                                                                                                                                                                   | 0.0006<br>(-0.01,0.01) | 0.911            | -0.004<br>(-0.02,0.01)                       | 0.563            |
| PRM <sup>FSAD</sup>                                                                                                                                                                                                                                                                                                                                                                                                                                                                                                                                                                                   | 0.01<br>(0.0008,0.02)  | 0.033            | 0.002<br>(-0.01,0.01)                        | 0.636            |
| <p>*Univariable or multivariable linear regression<br/> Abbreviations: BMI=body mass index, <math>\hat{\beta}</math>=estimated change log<sub>2</sub> UACR with a one unit increase in clinical characteristic, CI=confidence interval, FEV<sub>1</sub>=forced expiratory volume in 1 second, 6MWD=six-minute walk distance, SGRQ=St. George's Respiratory Questionnaire, CAT=COPD Assessment Test, LAA=low attenuation area, HU=Hounsfield units, PRM<sup>EMPH</sup>=emphysema by parametric response mapping, PRM<sup>FSAD</sup>=functional small airway disease by parametric response mapping</p> |                        |                  |                                              |                  |

**Supplementary Table 3. Urine mtDNA and imaging parameters**

|                                                                                                                                                                                                                                                                                                                                                                                                                                       | Unadjusted              |                  | Adjusted for age, sex, BMI, & smoking status |                  |
|---------------------------------------------------------------------------------------------------------------------------------------------------------------------------------------------------------------------------------------------------------------------------------------------------------------------------------------------------------------------------------------------------------------------------------------|-------------------------|------------------|----------------------------------------------|------------------|
|                                                                                                                                                                                                                                                                                                                                                                                                                                       | $\hat{\beta}$ (CI)      | <i>P</i> -value* | $\hat{\beta}$ (CI)                           | <i>P</i> -value* |
| %LAA (<-950 HU)                                                                                                                                                                                                                                                                                                                                                                                                                       | 0.003<br>(-0.01,0.01)   | 0.573            | 0.01<br>(0.002,0.03)                         | 0.028            |
| PRM <sup>EMPH</sup>                                                                                                                                                                                                                                                                                                                                                                                                                   | 0.005<br>(-0.01,0.02)   | 0.370            | 0.01<br>(0.002,0.03)                         | 0.028            |
| PRM <sup>FSAD</sup>                                                                                                                                                                                                                                                                                                                                                                                                                   | -0.0002<br>(-0.01,0.01) | 0.958            | 0.01<br>(-0.003,0.02)                        | 0.206            |
| <p>*Univariable or multivariable linear regression<br/> Abbreviations: BMI=body mass index, <math>\hat{\beta}</math>=estimated change log2 urine mtDNA with a one unit increase in clinical characteristic, CI=confidence interval, LAA=low attenuation area, HU=Hounsfield units, PRM<sup>EMPH</sup>=emphysema by parametric response mapping, PRM<sup>FSAD</sup>=functional small airway disease by parametric response mapping</p> |                         |                  |                                              |                  |

**Supplementary Table 4. Urine albumin/creatinine ratio in females compared to males**

| Unadjusted                                                                                                                                                                                    |                  | Adjusted for age, BMI, & smoking status |                  |
|-----------------------------------------------------------------------------------------------------------------------------------------------------------------------------------------------|------------------|-----------------------------------------|------------------|
| $\hat{\beta}$ (CI)                                                                                                                                                                            | <i>P-value</i> * | $\hat{\beta}$ (CI)                      | <i>P-value</i> * |
| -0.03<br>(-0.29,0.23)                                                                                                                                                                         | 0.805            | 0.08<br>(-0.18,0.34)                    | 0.551            |
| *Multivariable linear regression<br>Abbreviations: BMI=body mass index, $\hat{\beta}$ =estimated change log2 UACR with a one unit increase in clinical characteristic, CI=confidence interval |                  |                                         |                  |

**Supplementary Table 5. Urine albumin/creatinine ratio and clinical characteristics within males and females**

|                                    | Unadjusted            |                  | Adjusted for age, BMI, & smoking status |                  |
|------------------------------------|-----------------------|------------------|-----------------------------------------|------------------|
|                                    | $\hat{\beta}$ (CI)    | <i>P</i> -value* | $\hat{\beta}$ (CI)                      | <i>P</i> -value* |
| <b>FEV<sub>1</sub> % predicted</b> |                       |                  |                                         |                  |
| Males                              | -0.12 (-0.24,0.01)    | 0.072            | -0.09 (-0.21,0.04)                      | 0.189            |
| Females                            | -0.12 (-0.24,-0.0003) | 0.051            | -0.08 (-0.20,0.04)                      | 0.185            |
| <b>6MWD (meters)</b>               |                       |                  |                                         |                  |
| Males                              | -0.01 (-0.02,0.004)   | 0.168            | -0.01 (-0.02,0.01)                      | 0.407            |
| Females                            | -0.01 (-0.03,0.004)   | 0.163            | -0.01 (-0.03,0.01)                      | 0.210            |
| <b>SGRQ</b>                        |                       |                  |                                         |                  |
| Males                              | 0.01 (-0.003,0.02)    | 0.194            | 0.01 (-0.004,0.01)                      | 0.250            |
| Females                            | 0.004 (-0.004,0.01)   | 0.356            | 0.003 (-0.005,0.01)                     | 0.427            |
| <b>CAT (<math>\geq 10</math>)</b>  |                       |                  |                                         |                  |
| Males                              | 0.47 (0.06,0.87)      | 0.025            | 0.41 (0.01,0.81)                        | 0.047            |
| Females                            | 0.26 (0.12,0.64)      | 0.180            | 0.21 (0.17,0.59)                        | 0.289            |
| <b>%LAA (&lt;950 HU)</b>           |                       |                  |                                         |                  |
| Males                              | -0.01 (-0.02,0.01)    | 0.262            | -0.01 (-0.03,0.01)                      | 0.303            |
| Females                            | 0.02 (0.0004,0.03)    | 0.045            | 0.01 (-0.01,0.02)                       | 0.350            |
| <b>PRM<sup>EMPH</sup></b>          |                       |                  |                                         |                  |
| Males                              | -0.01 (-0.02,0.01)    | 0.296            | -0.01 (-0.02,0.01)                      | 0.394            |
| Females                            | 0.01 (-0.0004,0.03)   | 0.112            | 0.01 (-0.01,0.02)                       | 0.529            |
| <b>PRM<sup>FSAD</sup></b>          |                       |                  |                                         |                  |
| Males                              | 0.01 (-0.004,0.02)    | 0.194            | 0.004 (-0.01,0.02)                      | 0.568            |
| Females                            | 0.01 (-0.002,0.02)    | 0.106            | 0.001 (-0.01,0.01)                      | 0.824            |

\*Univariable or multivariable linear regression

Abbreviations: BMI=body mass index,  $\hat{\beta}$ =estimated change log<sub>2</sub> urine mtDNA with a one unit increase in clinical characteristic, CI=confidence interval, FEV<sub>1</sub>=forced expiratory volume in 1 second, 6MWD=six-minute walk distance, SGRQ=St. George's Respiratory Questionnaire, CAT=COPD Assessment Test, LAA=low attenuation area, HU=Hounsfield units, PRM<sup>EMPH</sup>=emphysema by parametric response mapping, PRM<sup>FSAD</sup>=functional small airway disease by parametric response mapping

A)

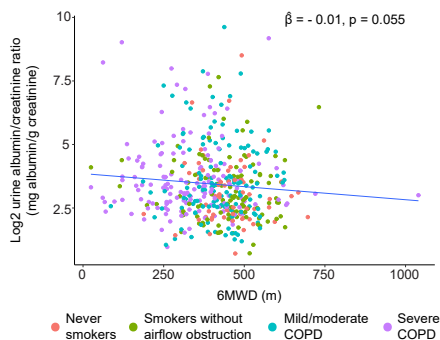

B)

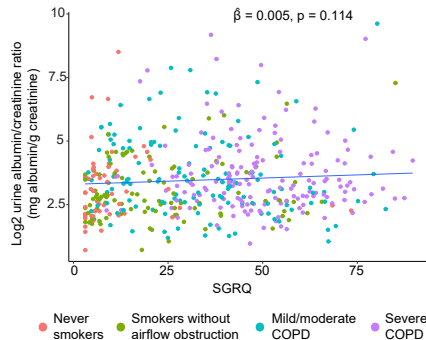

C)

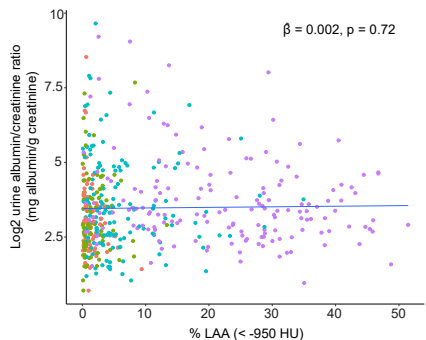

D)

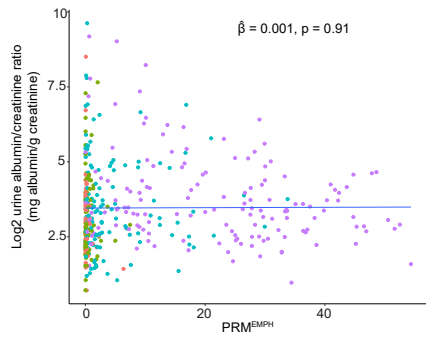

E)

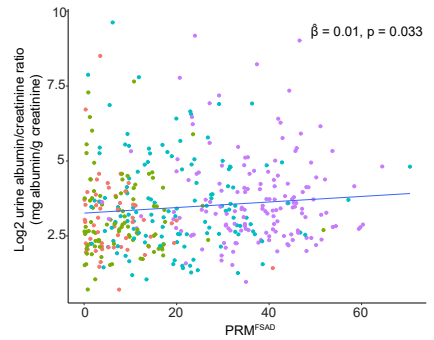

Supplementary Figure 1

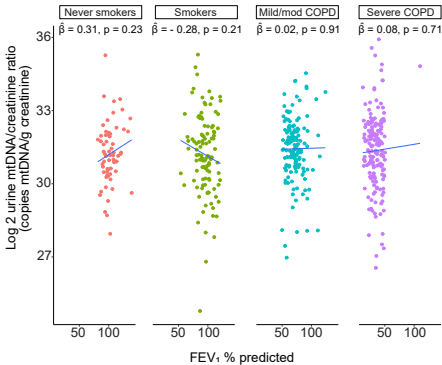

Supplementary Figure 2

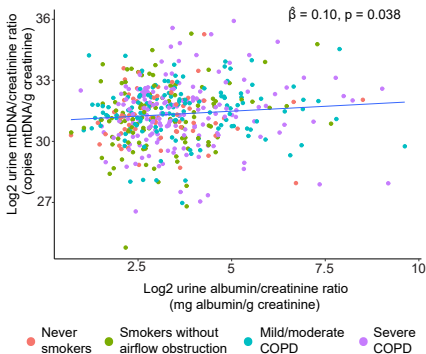

Supplementary Figure 3

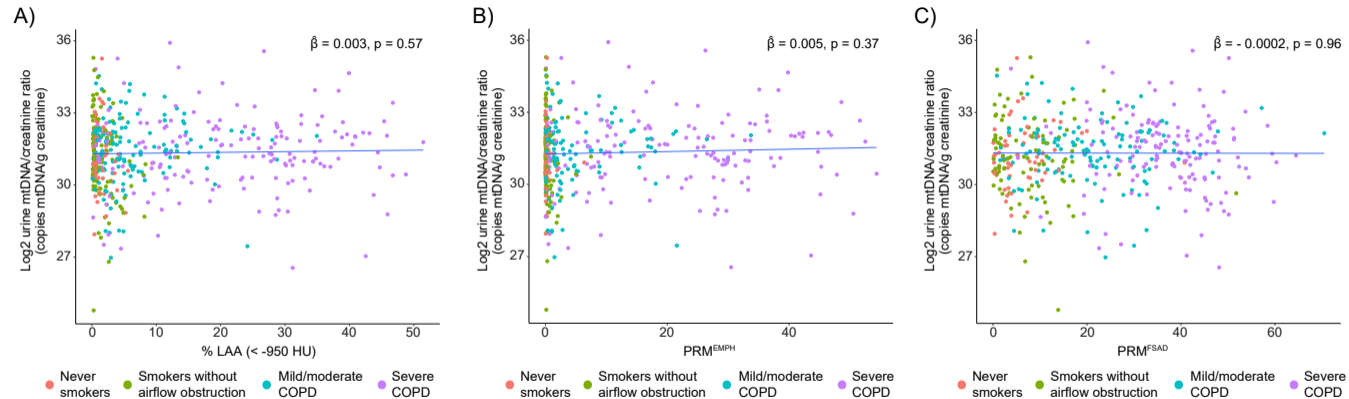

Supplementary Figure 4

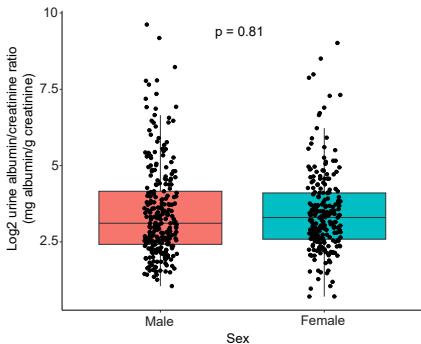

Supplementary Figure 5
